# Supplementary material for: Development of a sensitive method for the determination of parabens in complex samples by online coupling of magnetism-enhanced monolith-based in-tube solid phase microextraction with high performance liquid chromatography
Source: Royal Society of Chemistry journal article supplement (doi:10.1039/c8ay00026c), 2018-01-01
Supplement: c8ay00026c1.pdf [file c8ay00026c1.pdf]

*Supporting information*

**Development of a sensitive method for the determination of parabens in complex samples by online coupling of magnetism-enhanced monolith-based in-tube solid phase microextraction with high performance liquid chromatography**

Meng Mei, Jinling, Pang, Xiaojia Huang\*

*State Key Laboratory of Marine Environmental Science, Key Laboratory of the Ministry of Education for Coastal and Wetland Ecosystem, College of the Environment and Ecology, Xiamen University.*

\*Corresponding author. Tel: 086-0592-2189278; Fax: 086-0592-2183137

E-mail: hxj@xmu.edu.cn

Corresponding Address: P. O. Box 1009, Xiamen University, Xiamen 361005, China

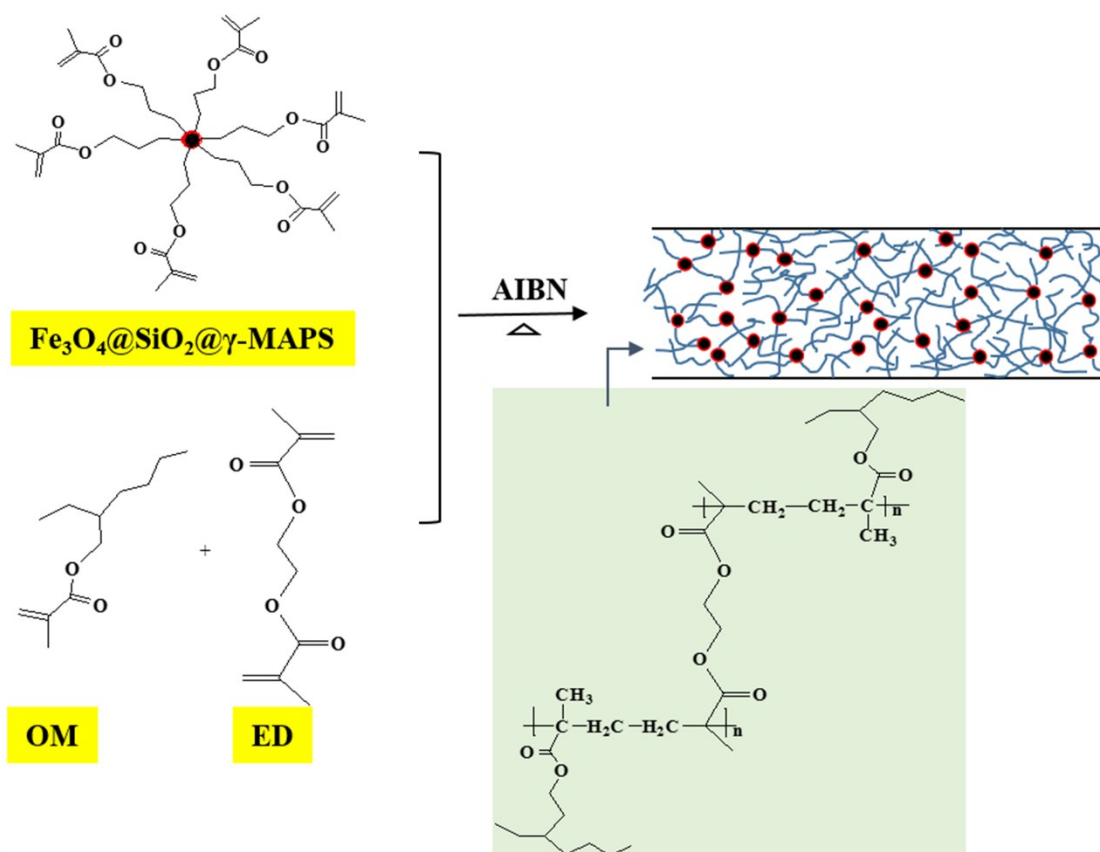

**Figure S1.** The preparation sketch of MCC/MNPs

**Table S1.** The basic information of four parabens

| Compounds | Molecular formula                              | Molecular mass | Chemical structures                                                                 | Log $K_{o/w}$ <sup>a</sup> | p $K_a$   |
|-----------|------------------------------------------------|----------------|-------------------------------------------------------------------------------------|----------------------------|-----------|
| i-PrP     | C <sub>10</sub> H <sub>12</sub> O <sub>3</sub> | 180.2          | 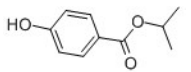 | 2.91                       | 8.40±0.15 |
| PrP       | C <sub>10</sub> H <sub>12</sub> O <sub>3</sub> | 180.2          |  | 3.04                       | 8.23±0.15 |
| i-BuP     | C <sub>11</sub> H <sub>14</sub> O <sub>3</sub> | 194.2          |  | 3.40                       | 8.17±0.15 |
| BuP       | C <sub>11</sub> H <sub>14</sub> O <sub>3</sub> | 194.2          |  | 3.57                       | 8.22±0.15 |

<sup>a</sup> Calculated via website: <http://www.vcclab.org/web/alogs/>.

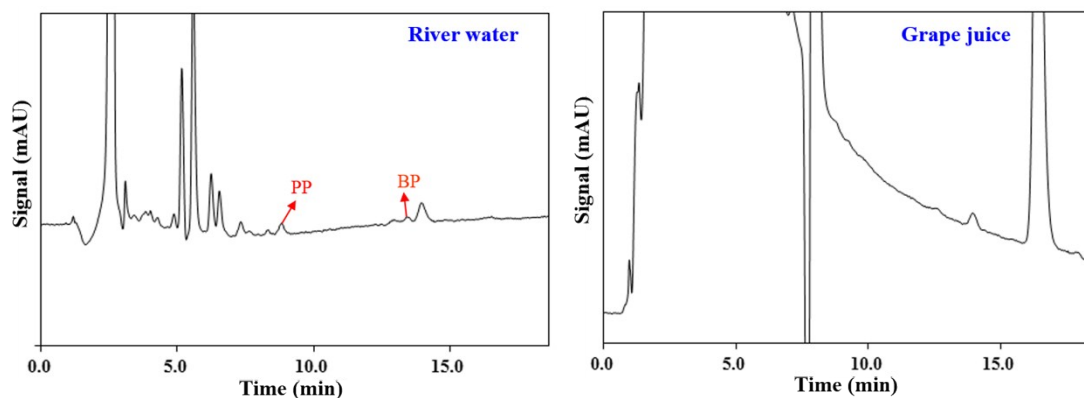

**Figure S2.** Typical chromatograms of parabens in real river water and grape juice sample

Experimental conditions: the intensity of magnetic field in adsorption and desorption steps were 20 Gs and -20 Gs, respectively; the sampling rate and volume of sample were 0.05 mL/min and 1.20 mL, respectively; the desorption flow rate was 0.03 mL/min with 100  $\mu$ L ACN/water (40/60, v/v) used as desorption solvent; the sample pH value was regulated to 5.0 and the ionic strength of sample was adjusted by addition of 4% (w/v) NaCl.
